# Supplementary material for: Magnetic graphene oxide modified by chloride imidazole ionic liquid for the high-efficiency adsorption of anionic dyes
Source: Royal Society of Chemistry journal article supplement (doi:10.1039/c6ra27530c), 2017-01-01
Supplement: c6ra27530c1.pdf [file c6ra27530c1.pdf]

# **A magnetic graphene oxide modified by chloride imidazole ionic liquid for high-efficiency adsorption of anionic dyes**

Huan Wang,<sup>a b</sup> Yinmao Wei<sup>a\*</sup>

<sup>a</sup> Key Laboratory of Synthetic and Natural Function Molecule Chemistry of Ministry of Education, College of Chemistry & Materials Science, Northwest University, Xi'an 710069, China. Email: ymwei@nwu.edu.cn

Fax: +86-29-88302604; Tel.: +86-29-88302604

<sup>b</sup> College of Chemistry and Chemical Engineering, Xianyang Normal College, Xianyang 712000, China

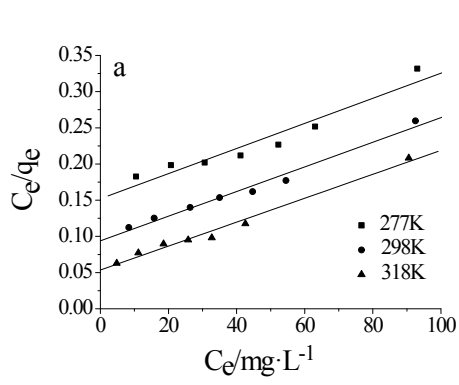

GR

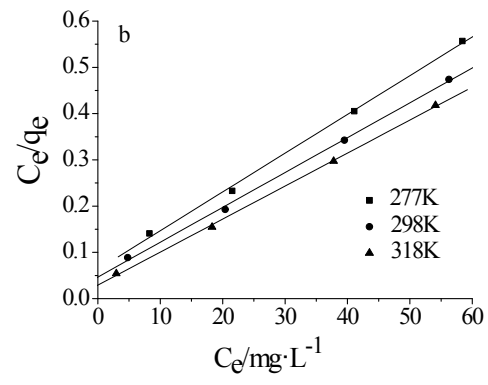

AO

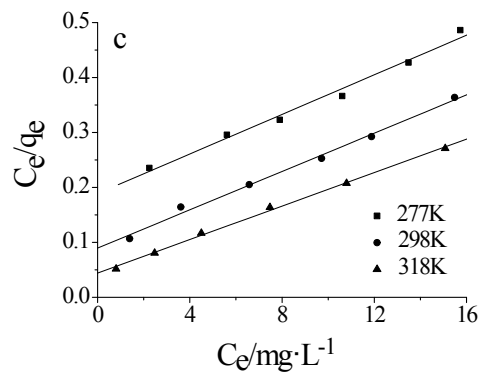

OIV

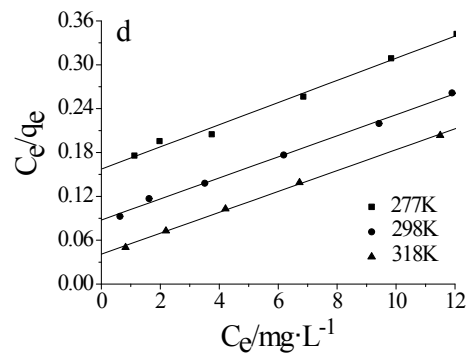

CV

Fig. S1 Langmuir model

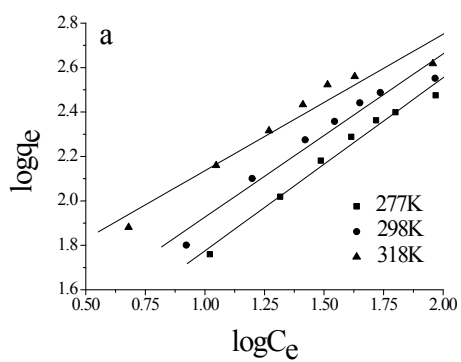

GR

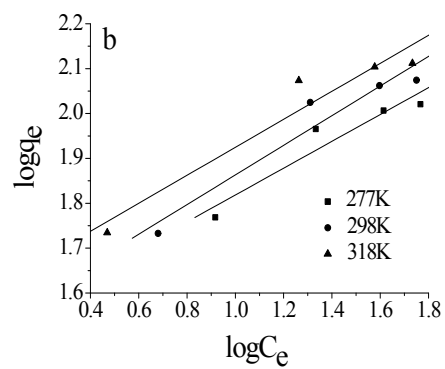

AO

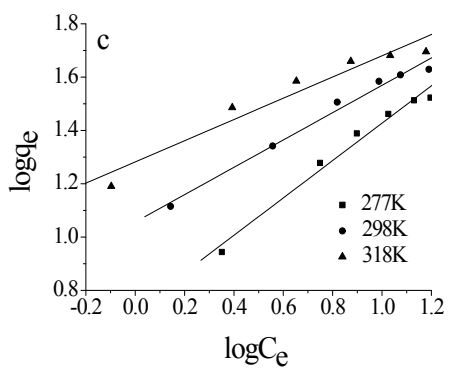

OIV

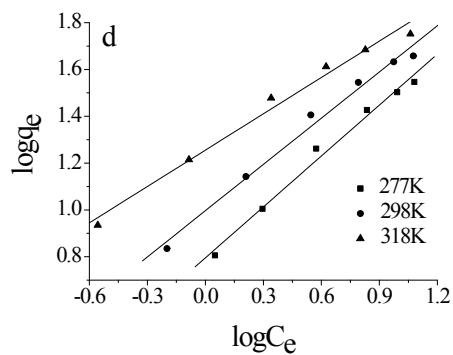

CV

**Fig. S2** Freundlich model

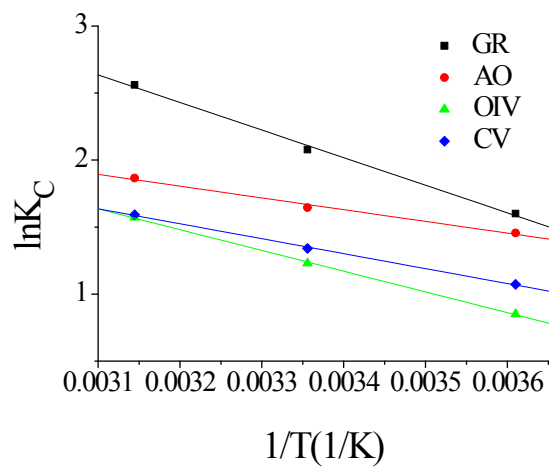

**Fig. S3** van't Hoff linear relationship
